# Supplementary material
Source: publisher figshare collection journal article supplement (https://acs.figshare.com/ndownloader/files/4032916)
Supplement: Supplementary file 1 [file 4032916]

# Quantum Dot Light-Emitting Diode with Quantum Dots Inside the Hole Transporting Layers

*Kheng Swee Leck,<sup>†</sup> Yoga Divayana,<sup>†,‡</sup> Dewei Zhao,<sup>†</sup> Xuyong Yang,<sup>†</sup> Agus Putu Abiyasa,<sup>†</sup>  
Evren Mutlugun,<sup>†,⊥</sup> Yuan Gao,<sup>†</sup> Shuwei Liu,<sup>†</sup> Swee Tiam Tan,<sup>†</sup> Xiao Wei Sun,<sup>\*,†,⊥</sup> and  
Hilmi Volkan Demir<sup>\*,†,§,⊥</sup>*

<sup>†</sup> LUMINOUS! Centre of Excellence for Semiconductor Lighting and Displays, School of  
Electrical and Electronic Engineering, Nanyang Technological University, Nanyang Avenue,  
Singapore 639798

<sup>‡</sup> School of Electrical Engineering, Udayana University, Kampus Bukit Jimbaran, Bali,  
Indonesia

<sup>§</sup> School of Physical and Mathematical Sciences, Nanyang Technological University,  
Nanyang Avenue, Singapore 639798

<sup>⊥</sup> Department of Electrical and Electronics Engineering, Department of Physics, UNAM–  
Institute of Materials Science and Nanotechnology, Bilkent University, Bilkent, Ankara,  
Turkey 06800

<sup>||</sup> South University of Science and Technology of China, Shenzhen, Guangdong, China  
518055

### In-film and in-solution quantum efficiency measurement

We have measured the in-film and in-solution quantum efficiency of the quantum dots using Hamamatsu-Quantaaurus quantum efficiency measurement setup and obtained similar values of quantum efficiency when the measurement is carried out with respect to reference dye.

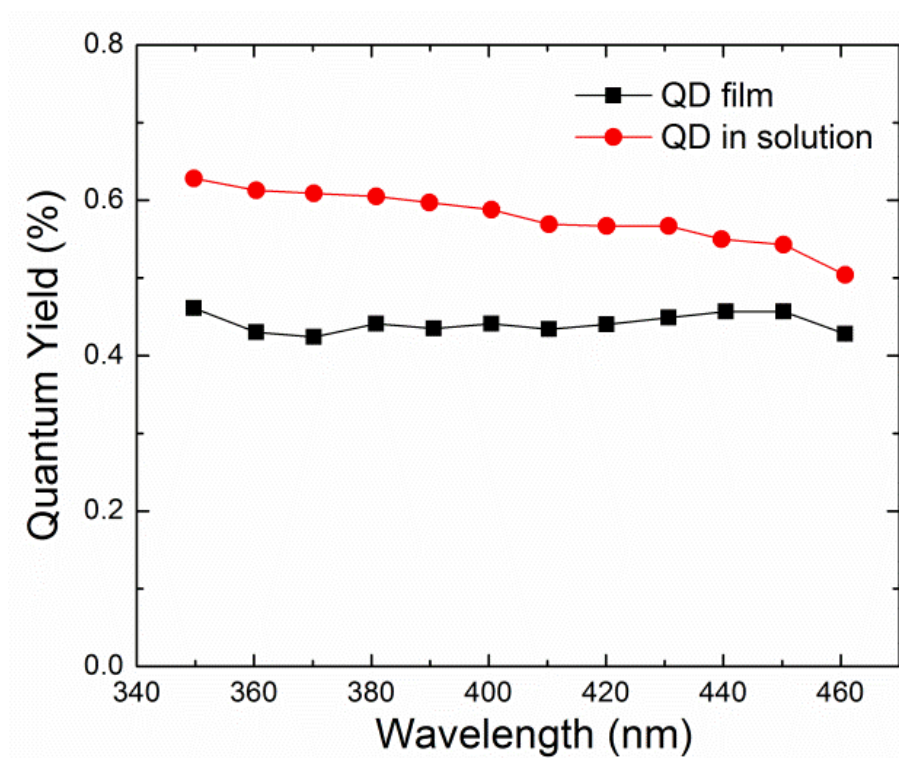

Figure S1. In-film and in-solution quantum efficiency of the quantum dots.
